# Supplementary material for: Outcomes in patients with and without disability admitted to hospital with COVID-19: a retrospective cohort study
Source: PubMed Central journal article supplement — CMAJ. 2022 Jan 24;194(4):E112–21. doi: 10.1503/cmaj.211277 (PMC8900770; doi:10.1503/cmaj.211277), 2022-01-24
Supplement: 211277-res-1-at.pdf [file 211277-res-1-at.pdf]

## **Supplement**

**Table S1. Presenting vital signs, laboratory values, and mortality risk scores in COVID-19 patients with and without a disability**

**Table S2. Mortality, ICU admission, and 30-day unplanned readmission among COVID-19 patients with and without disability, by sex**

**Table S3. Length of hospital stay among COVID-19 patients with and without a disability, by sex**

**Table S4. Mortality, ICU admission, length of hospital stay, and 30-day unplanned readmission among COVID-19 patients with and without a disability, by subtype of disability**

**Table S5. Mortality, ICU admission, and 30-day unplanned readmission among COVID-19 patients with and without disability, including dementia in the definition of disability**

**Table S6. Length of hospital stay among COVID-19 patients with and without a disability, including dementia in the definition of disability**

**Table S7. Mortality, ICU admission, length of hospital stay, and 30-day unplanned readmission among COVID-19 patients with and without disability, adjusting for number of prior hospitalizations in the study period**

**Table S1. Presenting vital signs, laboratory values, and mortality risk scores in COVID-19 patients with and without a disability**

| <b>Characteristic</b>                  | <b>Patients with a disability<br/>N=285</b> | <b>Patients without a disability<br/>N=994</b> | <b>SD</b> |
|----------------------------------------|---------------------------------------------|------------------------------------------------|-----------|
| <b>Vital signs</b>                     |                                             |                                                |           |
| Temperature, mean (SD)                 | 36.93 (0.87)                                | 37.06 (0.86)                                   | 0.15      |
| Systolic blood pressure, mean (SD)     | 131.61 (49.47)                              | 130.84 (49.47)                                 | 0.02      |
| Diastolic blood pressure, mean (SD)    | 72.26 (13.68)                               | 73.93 (14.32)                                  | 0.12      |
| Heart rate, mean (SD)                  | 87.00 (17.38)                               | 100.20 (351.20)                                | 0.05      |
| Respiratory rate, mean (SD)            | 20.48 (6.90)                                | 21.32 (9.72)                                   | 0.10      |
| SF estimate, mean (SD)                 | 383.48 (124.26)                             | 387.10 (122.85)                                | 0.03      |
| Supplemental oxygen, n (%)             | 136 (48.9)                                  | 432 (44.7)                                     | 0.08      |
|                                        |                                             |                                                |           |
| <b>Laboratory values</b>               |                                             |                                                |           |
| Hemoglobin mean (SD))                  | 120.13 (25.50)                              | 126.02 (23.08)                                 | 0.24      |
| Hematocrit, mean (SD)                  | 0.37 (0.08)                                 | 0.38 (0.06)                                    | 0.17      |
| White blood cell count, mean (SD)      | 9.63 (7.12)                                 | 8.82 (5.25)                                    | 0.13      |
| Platelet count, mean (SD)              | 238.29 (110.72)                             | 234.45 (109.88)                                | 0.04      |
| Neutrophils, mean (SD)                 | 7.25 (4.65)                                 | 6.68 (4.51)                                    | 0.13      |
| Lymphocyte, mean (SD)                  | 1.49 (4.53)                                 | 1.26 (1.35)                                    | 0.07      |
| Sodium, mean (SD)                      | 137.94 (7.43)                               | 136.59 (6.36)                                  | 0.10      |
| Bicarbonate, mean (SD)                 | 23.84 (4.15)                                | 24.22 (4.14)                                   | 0.09      |
| Creatinine, mean (SD)                  | 153.60 (178.93)                             | 126.21 (134.00)                                | 0.17      |
| Blood urea nitrogen (BUN), mean (SD)   | 13.36 (11.59)                               | 8.93 (8.00)                                    | 0.44      |
| Albumin, mean (SD)                     | 32.65 (6.20)                                | 32.09 (6.64)                                   | 0.09      |
| Bilirubin, mean (SD)                   | 12.77 (14.48)                               | 12.15 (10.88)                                  | 0.05      |
| CRP, mean (SD)                         | 107.74 (93.94)                              | 102.25 (91.08)                                 | 0.06      |
| Lactate, mean (SD)                     | 2.22 (1.58)                                 | 2.13 (1.76)                                    | 0.05      |
| LDH, mean (SD)                         | 338.58 (159.35)                             | 359.43 (210.13)                                | 0.11      |
| D-dimer, mean (SD)                     | 1,490.08 (1,079.86)                         | 1,480.71 (1,529.42)                            | 0.01      |
| Ferritin, mean (SD)                    | 895.02 (1149.42)                            | 870.29 (1144.60)                               | 0.02      |
| Glucose, mean (SD)                     | 9.26 (5.99)                                 | 8.26 (4.35)                                    | 0.19      |
| Arterial paCO <sub>2</sub> , mean (SD) | 47.91 (17.92)                               | 47.45 (18.07)                                  | 0.03      |
| Arterial paO <sub>2</sub> , mean (SD)  | 79.59 (31.99)                               | 87.97 (46.82)                                  | 0.21      |
|                                        |                                             |                                                |           |
| <b>Mortality risk scores</b>           |                                             |                                                |           |
| mAPACHE score, mean (SD) <sup>a</sup>  | 31.02 (10.60)                               | 24.87 (11.28)                                  | 0.56      |
| ISARIC-4C, mean (SD) <sup>b</sup>      | 10.33 (3.55)                                | 8.97 (4.08)                                    | 0.35      |

Table S1 Legend.

<sup>a</sup> Includes mechanical ventilation; laboratory values for: albumin, bilirubin, blood urea nitrogen, creatinine, glucose, hematocrit, sodium, white blood cell count; respiratory rate; pulse rate; temperature; mean arterial pressure; and comorbidities: cirrhosis, hepatic failure, HIV, leukemia, lymphoma, immunosuppression, metastatic cancer, and multiple myeloma.

<sup>b</sup> Includes age, sex at birth, number of comorbidities on Charlson Comorbidity Index, respiratory rate, peripheral oxygen saturation on room air, Glasgow coma scale score, urea, C-reactive protein.

**Table S2. Mortality, ICU admission, and 30-day unplanned readmission among COVID-19 patients with and without a disability, by sex**

| <b>Outcome</b> | <b>N (%) with outcome</b> | <b>Unadjusted RR (95% CI)</b> | <b>Adjusted RR (95% CI) <sup>a</sup></b> | <b>Adjusted RR (95% CI) <sup>b</sup></b> | <b>Adjusted RR (95% CI) <sup>c</sup></b> |
|----------------|---------------------------|-------------------------------|------------------------------------------|------------------------------------------|------------------------------------------|
| <b>Males</b>   |                           |                               |                                          |                                          |                                          |
| Mortality      |                           |                               |                                          |                                          |                                          |
| No disability  | 108 (18.4)                | (Referent)                    | (Referent)                               | (Referent)                               | (Referent)                               |
| Disability     | 43 (27.9)                 | 1.53 (1.06-2.20)              | 0.97 (0.66-1.42)                         | 0.94 (0.64-1.38)                         | 0.90 (0.61-1.33)                         |
| ICU admission  |                           |                               |                                          |                                          |                                          |
| No disability  | 184 (31.3)                | (Referent)                    | (Referent)                               | (Referent)                               | (Referent)                               |
| Disability     | 35 (22.7)                 | 0.76 (0.53-1.10)              | 0.92 (0.63-1.34)                         | 0.95 (0.65-1.39)                         | 0.95 (0.65-1.40)                         |
| Readmission    |                           |                               |                                          |                                          |                                          |
| No disability  | 40 (8.8)                  | (Referent)                    | (Referent)                               | (Referent)                               | (Referent)                               |
| Disability     | 24 (21.6)                 | 2.29 (1.34-3.93)              | 2.08 (1.19-3.65)                         | 1.78 (1.02-3.08)                         | 1.75 (1.01-3.03)                         |
| <b>Females</b> |                           |                               |                                          |                                          |                                          |
| Mortality      |                           |                               |                                          |                                          |                                          |
| No disability  | 67 (16.5)                 | (Referent)                    | (Referent)                               | (Referent)                               | (Referent)                               |
| Disability     | 37 (28.2)                 | 1.65 (1.09-2.51)              | 1.33 (0.88,2.02)                         | 1.33 (0.87, 2.02)                        | 1.23 (0.81, 1.87)                        |
| ICU admission  |                           |                               |                                          |                                          |                                          |
| No disability  | 97 (23.9)                 | (Referent)                    | (Referent)                               | (Referent)                               | (Referent)                               |
| Disability     | 29 (22.1)                 | 0.92 (0.60-1.41)              | 1.06 (0.68-1.65)                         | 1.06 (0.68-1.66)                         | 1.06 (0.68-1.65)                         |
| Readmission    |                           |                               |                                          |                                          |                                          |
| No disability  | 21 (6.5)                  | (Referent)                    | (Referent)                               | (Referent)                               | (Referent)                               |
| Disability     | 12 (12.8)                 | 1.63 (0.79-3.37)              | 1.74 (0.83-3.63)                         | 1.70 (0.81-3.58)                         | 1.70 (0.81-3.57)                         |

Table S2 Legend. RR = relative risk, generated using modified Poisson regression

All models adjust for hospital fixed effects. Overall models also adjust for age.

<sup>a</sup> Model adjusts for sex, and long-term care facility residence.

<sup>b</sup> Model further adjusts for medical comorbidity, dementia, and psychiatric disorders

<sup>c</sup> Model further adjusts for predicted mortality risk at admission using mAPACHE score.

**Table S3. Length of hospital stay among COVID-19 patients with and without a disability, by sex**

| <b>Outcome</b> | <b>N (%) with outcome</b> | <b>Unadjusted RR (95% CI)</b> | <b>Adjusted RR (95% CI) <sup>a</sup></b> | <b>Adjusted RR (95% CI) <sup>b</sup></b> | <b>Adjusted RR (95% CI) <sup>c</sup></b> |
|----------------|---------------------------|-------------------------------|------------------------------------------|------------------------------------------|------------------------------------------|
| <b>Males</b>   |                           |                               |                                          |                                          |                                          |
| Length of stay |                           |                               |                                          |                                          |                                          |
| No disability  | 7.64 (3.26, 16.73)        | (Referent)                    | (Referent)                               | (Referent)                               | (Referent)                               |
| Disability     | 15.02 (6.11, 29.97)       | 1.41 (1.17-1.69)              | 1.28 (1.06-1.55)                         | 1.24 (1.03-1.49)                         | 1.26 (1.04-1.52)                         |
|                |                           |                               |                                          |                                          |                                          |
| <b>Females</b> |                           |                               |                                          |                                          |                                          |
| Length of stay |                           |                               |                                          |                                          |                                          |
| No disability  | 8.21 (3.77, 16.80)        | (Referent)                    | (Referent)                               | (Referent)                               | (Referent)                               |
| Disability     | 12.37 (5.10, 29.87)       | 1.62 (1.33-1.98)              | 1.53 (1.25-1.87)                         | 1.46 (1.20-1.77)                         | 1.46 (1.20-1.77)                         |

Table S3 Legend. IQR = interquartile range; RR = rate ratio, generated using negative binomial regression  
All models adjust for hospital fixed effects. Overall models also adjust for age.

<sup>a</sup> Model adjusts for sex, and long-term care facility residence.

<sup>b</sup> Model further adjusts for medical comorbidity, dementia, and psychiatric disorders

<sup>c</sup> Model further adjusts for predicted mortality risk at admission using mAPACHE score.

**Table S4. Mortality, ICU admission, length of hospital stay, and 30-day unplanned readmission among COVID-19 patients with and without a disability, by subtype of disability**

|                                                                                     | <b>Mortality<br/>N (%)</b> | <b>ICU admission<br/>N (%)</b> | <b>Length of stay<br/>Median (IQR)</b> | <b>30-day<br/>readmission<br/>N (%)</b> |
|-------------------------------------------------------------------------------------|----------------------------|--------------------------------|----------------------------------------|-----------------------------------------|
| <b>Physical disability only (n=212)</b>                                             | 59 (27.8)                  | 49 (23.1)                      | 13.93 (5.85, 30.46)                    | 28 (18.3)                               |
| <b>Hearing or vision impairment only (n=18)</b>                                     | < 6                        | < 6                            | 11.43 (6.72, 18.20)                    | < 6                                     |
| <b>Traumatic brain injury or intellectual/ developmental disability only (n=24)</b> | 9 (37.5)                   | 6 (25.0)                       | 12.18 (4.66, 32.95)                    | < 6                                     |
| <b>Multiple disabilities (n=31)</b>                                                 | < 6                        | < 6                            | 17.84 (5.25, 25.05)                    | < 6                                     |
| <b>No disabilities (n=994)</b>                                                      | 175 (17.6)                 | 281 (28.3)                     | 7.81 (3.55, 16.79)                     | 61 (7.9)                                |

Table S4 Legend. Exact values less than 6 suppressed to reduce risk of patient reidentification.

**Table S5. Mortality, ICU admission, and 30-day unplanned readmission among COVID-19 patients with and without disability, including dementia in the definition of disability**

| <b>Outcome</b> | <b>N (%) with outcome</b> | <b>Unadjusted RR (95% CI)</b> | <b>Adjusted RR (95% CI) <sup>a</sup></b> | <b>Adjusted RR (95% CI) <sup>b</sup></b> | <b>Adjusted RR (95% CI) <sup>c</sup></b> |
|----------------|---------------------------|-------------------------------|------------------------------------------|------------------------------------------|------------------------------------------|
| Mortality      |                           |                               |                                          |                                          |                                          |
| No disability  | 149 (16.1)                | (Referent)                    | (Referent)                               | (Referent)                               | (Referent)                               |
| Disability     | 106 (29.8)                | 1.80 (1.39, 2.33)             | 1.09 (0.82, 1.45)                        | 1.00 (0.74, 1.35)                        | 1.00 (0.74, 1.35)                        |
| ICU admission  |                           |                               |                                          |                                          |                                          |
| No disability  | 276 (29.9)                | (Referent)                    | (Referent)                               | (Referent)                               | (Referent)                               |
| Disability     | 69 (19.4)                 | 0.66 (0.50, 0.87)             | 0.85 (0.64, 1.13)                        | 0.87 (0.65, 1.17)                        | 0.87 (0.65, 1.17)                        |
| Readmission    |                           |                               |                                          |                                          |                                          |
| No disability  | 55 (7.5)                  | (Referent)                    | (Referent)                               | (Referent)                               | (Referent)                               |
| Disability     | 42 (16.8)                 | 2.09 (1.37, 3.18)             | 2.12 (1.35, 3.34)                        | 1.80 (1.14, 2.84)                        | 1.81 (1.16, 2.85)                        |

Table S5 Legend. RR = relative risk, generated using modified Poisson regression

All models adjust for hospital fixed effects. Overall models also adjust for age.

<sup>a</sup> Model adjusts for sex, and long-term care facility residence.

<sup>b</sup> Model further adjusts for medical comorbidity and psychiatric disorders

<sup>c</sup> Model further adjusts for predicted mortality risk at admission using mAPACHE score.

**Table S6. Length of hospital stay among COVID-19 patients with and without a disability, including dementia in the definition of disability**

| <b>Outcome</b> | <b>Median (IQR)</b> | <b>Unadjusted RR<br/>(95% CI)</b> | <b>Adjusted RR<br/>(95% CI) <sup>a</sup></b> | <b>Adjusted RR<br/>(95% CI) <sup>b</sup></b> | <b>Adjusted RR<br/>(95% CI) <sup>c</sup></b> |
|----------------|---------------------|-----------------------------------|----------------------------------------------|----------------------------------------------|----------------------------------------------|
| Length of stay |                     |                                   |                                              |                                              |                                              |
| No disability  | 7.45 [3.51, 15.71]  | (Referent)                        | (Referent)                                   | (Referent)                                   | (Referent)                                   |
| Disability     | 13.94 [5.78, 30.32] | 1.61 (1.42, 1.83)                 | 1.44 (1.26, 1.65)                            | 1.37 (1.19, 1.57)                            | 1.37 (1.19, 1.57)                            |

Table S6 Legend. IQR = interquartile range; RR = rate ratio, generated using negative binomial regression

All models adjust for hospital fixed effects. Overall models also adjust for age.

<sup>a</sup> Model adjusts for sex, and long-term care facility residence.

<sup>b</sup> Model further adjusts for medical comorbidity and psychiatric disorders

<sup>c</sup> Model further adjusts for predicted mortality risk at admission using mAPACHE score.

**Table S7. Mortality, ICU admission, length of hospital stay, and 30-day unplanned readmission among COVID-19 patients with and without disability, adjusting for number of prior hospitalizations in the study period**

| <b>Outcome</b> | <b>Adjusted RR<br/>(95% CI) <sup>a</sup></b> | <b>Adjusted RR<br/>(95% CI) <sup>b</sup></b> |
|----------------|----------------------------------------------|----------------------------------------------|
| Mortality      |                                              |                                              |
| No disability  | (Referent)                                   | (Referent)                                   |
| Disability     | 1.09 (0.82, 1.44)                            | 1.03 (0.78, 1.36)                            |
| Length of stay |                                              |                                              |
| No disability  | (Referent)                                   | (Referent)                                   |
| Disability     | 1.36 (1.19, 1.56)                            | 1.37 (1.19, 1.57)                            |
| ICU admission  |                                              |                                              |
| No disability  | (Referent)                                   | (Referent)                                   |
| Disability     | 1.00 (0.75, 1.33)                            | 0.99 (0.75, 1.33)                            |
| Readmission    |                                              |                                              |
| No disability  | (Referent)                                   | (Referent)                                   |
| Disability     | 1.84 (1.18, 2.86)                            | 1.83 (1.18, 2.84)                            |

Table S7 Legend. RR = relative risk, generated using modified Poisson regression, for mortality, ICU admission, and readmission. RR = rate ratio, generated using negative binomial regression, for length of stay.

All models adjust for hospital fixed effects. Overall models also adjust for age.

<sup>a</sup> Model adjusts for sex, long-term care facility residence, medical comorbidity, dementia, psychiatric disorders, and prior hospitalizations in the study period.

<sup>b</sup> Model further adjusts for predicted mortality risk at admission using mAPACHE score.
